# Supplementary material for: BATS: a Bayesian user-friendly software for Analyzing Time Series microarray experiments
Source: Springer Nature journal article supplement (doi:10.1186/1471-2105-9-415), 2008-10-06
Supplement: 12859_2008_2400_MOESM1_ESM.pdf [file 12859_2008_2400_MOESM1_ESM.pdf]

# Bayesian Analysis for Time Series Microarray Experiments

Version 1.0

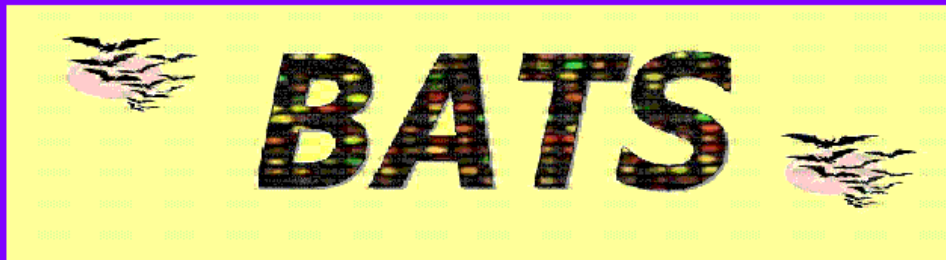

Help

About

Simulations

Analysis

Utilities

Close
