# Supplementary material for: BATS: a Bayesian user-friendly software for Analyzing Time Series microarray experiments
Source: Springer Nature journal article supplement (doi:10.1186/1471-2105-9-415), 2008-10-06
Supplement: 12859_2008_2400_MOESM2_ESM.pdf [file 12859_2008_2400_MOESM2_ESM.pdf]

## BATS-Analysis: Set Analysis Parameters

Select dataset file

cicatiello\_et\_al.xls

Load dataset

 Function type Legendre  Fourier Smoothness of the profilesvi:  Maximal degree of polynomialL: 

Estimation of the noise variance

 Standard  MAD  
 Custom Expected degree of polynomiallambda: 

Proportion of DE genes

 Universal  
 Custom proportion Tau<sup>2</sup> interval [X<sub>0</sub>, X<sub>1</sub>]X<sub>0</sub>:  X<sub>1</sub>: 

Choice of the prior model

 Model1 (Delta)  
 Model 2 (Inverse gamma)  
 Model 3 (Double exponential) Estimation of the polinomial degree Map  Mean Test procedure Binomial  
 Truncated poisson  
 Standard odds  
 Standard BF  
 Full ranked list Display & Save estimated profiles:

Scale options

 Global scale  Auto scale

Ordered genes profiles to plot

nfirst: 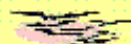**BATS**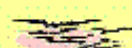

&lt;&lt; Back

About

Help

Perform analysis
