# Supplementary material for: BATS: a Bayesian user-friendly software for Analyzing Time Series microarray experiments
Source: Springer Nature journal article supplement (doi:10.1186/1471-2105-9-415), 2008-10-06

## BATS-Simulation: Create a Synthetic Data Set

Time grid

times: 

Number of replications

rep: 

Number of genes

n: 

Differentially expressed genes

DE: 

Maximal degree of polynomial

L: 

Unrealistic values threshold

T: 

Noise type

 Normal  Student

Number of runs

Runs: 

Number of different datasets

nn: 

Standard deviation of the noise

std: 

Signal to noise ratio range [a , b]

a: b:  Custom random number seed Save this synthetic data set

Data set file suffix:

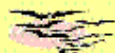**BATS**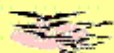

Supplement: 12859_2008_2400_MOESM3_ESM.pdf [file 12859_2008_2400_MOESM3_ESM.pdf]
