# Supplementary material for: BATS: a Bayesian user-friendly software for Analyzing Time Series microarray experiments
Source: Springer Nature journal article supplement (doi:10.1186/1471-2105-9-415), 2008-10-06

G7116 detected as differentially expressed in rank 2

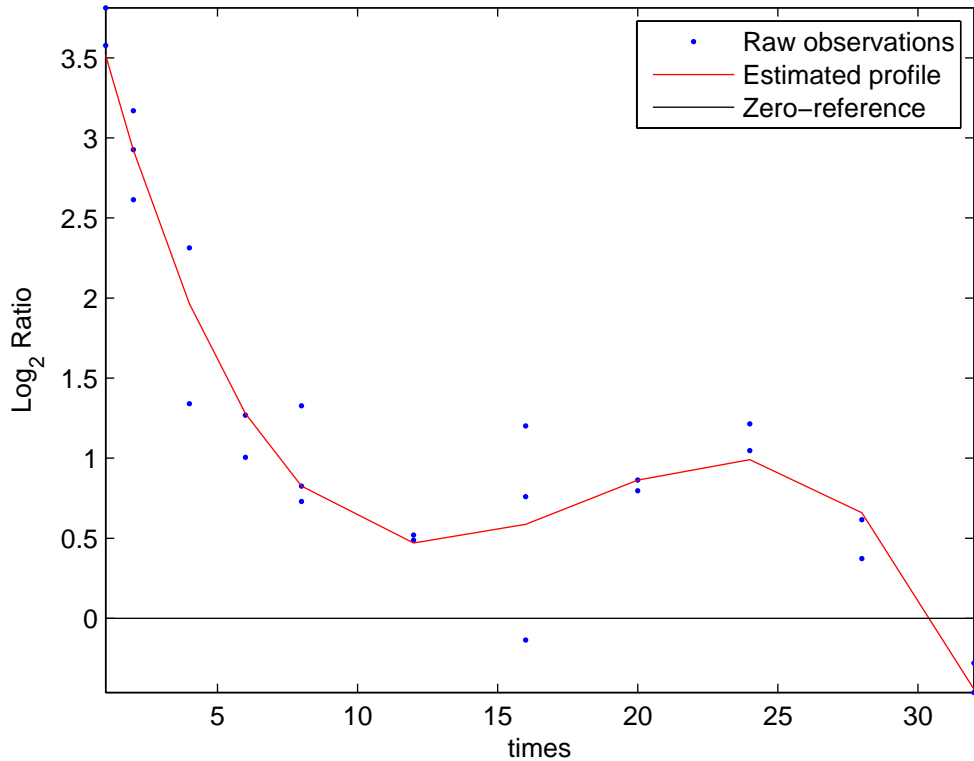

Supplement: 12859_2008_2400_MOESM4_ESM.pdf [file 12859_2008_2400_MOESM4_ESM.pdf]
