# Supplementary material for: BATS: a Bayesian user-friendly software for Analyzing Time Series microarray experiments
Source: Springer Nature journal article supplement (doi:10.1186/1471-2105-9-415), 2008-10-06
Supplement: 12859_2008_2400_MOESM5_ESM.pdf [file 12859_2008_2400_MOESM5_ESM.pdf]

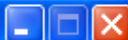

# BATS-Utilities

Choose an utility

Compare results

Filter data

Data box plots

Plot profiles

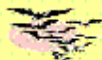

# BATS

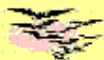

<< Back

About

Help
